# Supplementary material
Source: PubMed Central journal article supplement (PMC4820735)
Supplement: jcav07p0587s1.pdf [file jcav07p0587s1.pdf]

Figure S1

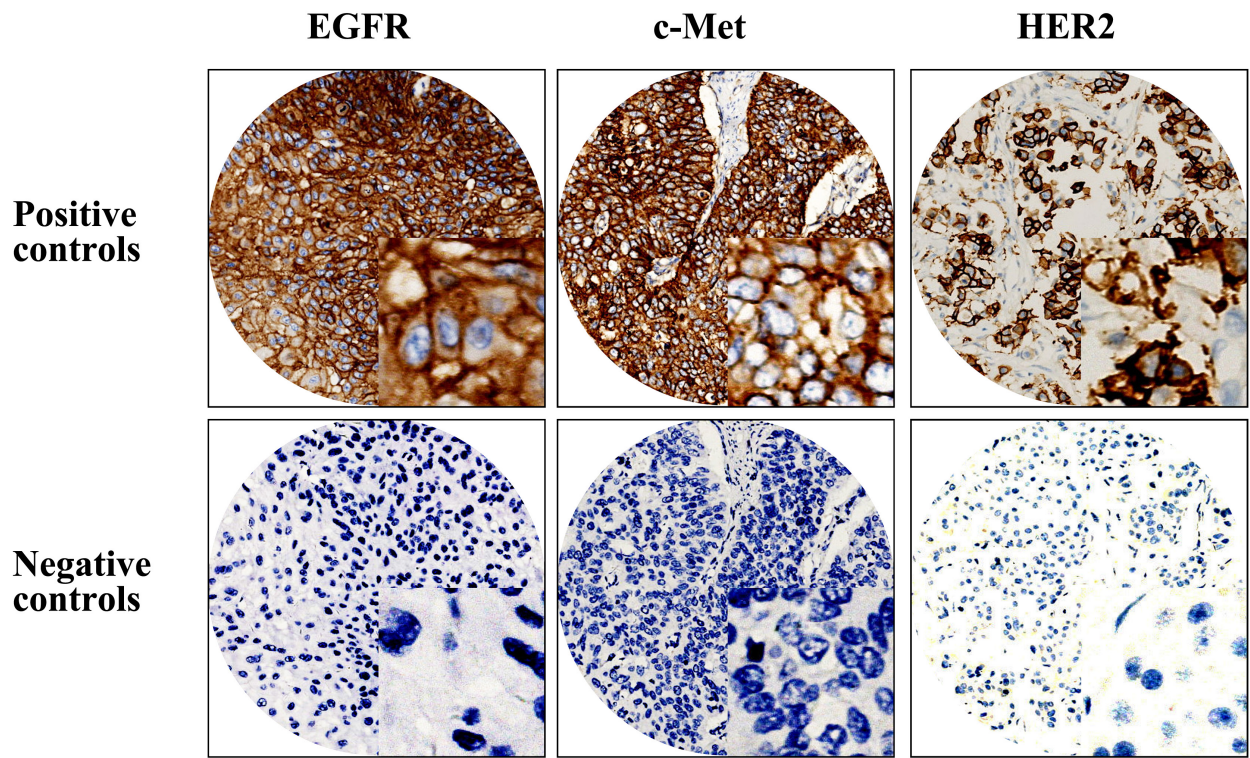

Table S1

| Characteristics          | EGFR       |                 |         | C-MET      |                 |         | HER2       |             |         |
|--------------------------|------------|-----------------|---------|------------|-----------------|---------|------------|-------------|---------|
|                          | high       | low or negative | p-value | high       | low or negative | p-value | positive   | negative    | p-value |
| Age                      |            |                 |         |            |                 |         |            |             |         |
| ≤65                      | 51 (52.6%) | 46 (47.4%)      | 0.366   | 42 (43.3%) | 55 (56.7%)      | 0.370   | 10 (10.3%) | 87 (89.7%)  | 0.643   |
| >65                      | 50 (60.2%) | 33 (39.8%)      |         | 42 (50.6%) | 41 (49.4%)      |         | 11 (13.3%) | 72 (86.7%)  |         |
| Sex                      |            |                 |         |            |                 |         |            |             |         |
| Male                     | 92 (56.1%) | 72 (43.9%)      | 1.000   | 74 (45.1%) | 90 (54.9%)      | 0.201   | 18 (11%)   | 146 (89.0%) | 0.406*  |
| Female                   | 9 (56.3%)  | 7 (43.7%)       |         | 10 (62.5%) | 6 (37.5%)       |         | 3 (18.8%)  | 13 (81.2%)  |         |
| Smoking                  |            |                 |         |            |                 |         |            |             |         |
| No                       | 19 (63.3%) | 11 (36.7%)      | 0.426   | 16 (53.3%) | 14 (46.7%)      | 0.548   | 4 (13.3%)  | 26 (86.7%)  | 0.757*  |
| Yes                      | 82 (54.7%) | 68 (45.3%)      |         | 68 (44.3%) | 82 (54.7%)      |         | 17 (11.3%) | 133 (88.7%) |         |
| Alcohol use              |            |                 |         |            |                 |         |            |             |         |
| No                       | 20 (51.3%) | 19 (48.7%)      | 0.585   | 21 (53.8%) | 18 (46.2%)      | 0.135   | 6 (15.4%)  | 33 (84.6%)  | 0.582*  |
| Yes                      | 81 (57.5%) | 60 (42.5%)      |         | 63 (44.7%) | 78 (55.3%)      |         | 15 (10.6%) | 126 (89.4%) |         |
| Primary tumor site       |            |                 |         |            |                 |         |            |             |         |
| Upper                    | 2 (50.0%)  | 2 (50.0%)       | 0.871*  | 3 (75%)    | 1 (25%)         | 0.550*  | 0 (0.0%)   | 4 (100%)    | 1.000*  |
| Middle                   | 46 (58.2%) | 33 (41.8%)      |         | 37 (46.8%) | 42 (53.2%)      |         | 9 (11.4%)  | 70 (88.6%)  |         |
| Lower                    | 53 (54.6%) | 44 (45.4)       |         | 44 (45.4%) | 53 (54.6%)      |         | 12 (12.4)  | 85 (87.6%)  |         |
| Differentiation          |            |                 |         |            |                 |         |            |             |         |
| Well                     | 7 (31.8%)  | 15 (68.2%)      | 0.038   | 10 (47.6%) | 11 (52.4%)      | 0.472   | 0 (0.0%)   | 21 (100%)   | 0.249*  |
| Moderate                 | 68 (57.6%) | 50 (42.4%)      |         | 52 (43.6%) | 67 (56.3%)      |         | 15 (12.6%) | 104 (87.4%) |         |
| Poor                     | 26 (65.0%) | 14 (35.0%)      |         | 22 (55.0%) | 18 (45.0%)      |         | 6 (15%)    | 34 (85%)    |         |
| Venous or nerve invasion |            |                 |         |            |                 |         |            |             |         |
| Non invasion             | 75 (57.3%) | 56 (42.7%)      | 0.736   | 62 (47.3%) | 69 (52.7%)      | 0.867   | 15 (11.5%) | 116 (88.5%) | 1.000   |
| Invasion                 | 26 (53.1%) | 23 (46.9%)      |         | 22 (44.9)  | 27 (55.1%)      |         | 6 (12.2%)  | 43 (87.8%)  |         |
| Stage                    |            |                 |         |            |                 |         |            |             |         |
| IIA-III A                | 59 (57.3%) | 44 (42.7%)      | 0.762   | 47 (45.6%) | 56 (54.4%)      | 0.765   | 14 (13.6%) | 89 (86.4%)  | 0.482   |
| IIIB-IIIC                | 42 (54.5%) | 35 (45.5%)      |         | 37 (48.1%) | 40 (51.9%)      |         | 7 (9.1%)   | 70 (90.9%)  |         |
| N stage                  |            |                 |         |            |                 |         |            |             |         |
| N0-N1                    | 54 (56.8%) | 41 (43.2%)      | 0.881   | 43 (45.3%) | 52 (54.7%)      | 0.765   | 13 (13.7%) | 82 (86.3%)  | 0.478   |
| N2-N3                    | 47 (55.3%) | 38 (44.7%)      |         | 41 (48.2%) | 44 (51.8%)      |         | 8 (9.4%)   | 77 (90.6%)  |         |
| T stage                  |            |                 |         |            |                 |         |            |             |         |
| T1-2                     | 27 (62.8%) | 16 (37.2%)      | 0.379   | 21 (48.9%) | 22 (51.1%)      | 0.861   | 7 (16.3%)  | 36 (83.7%)  | 0.414   |
| T3-4                     | 74 (54.0%) | 63 (46.0%)      |         | 63 (46.0%) | 74 (54.0%)      |         | 14 (10.2%) | 123 (89.8)  |         |
| Radiotherapy             |            |                 |         |            |                 |         |            |             |         |
| No                       | 48 (53.9%) | 41 (46.1%)      | 0.652   | 42 (47.2%) | 47 (52.8%)      | 1.000   | 15 (16.9%) | 74 (83.1%)  | 0.038   |
| Yes                      | 53 (58.2%) | 38 (41.8%)      |         | 42 (46.2%) | 49 (53.8%)      |         | 6 (6.6%)   | 85 (93.4%)  |         |
| Chemotherapy             |            |                 |         |            |                 |         |            |             |         |
| No                       | 54 (54.0%) | 46 (46.0%)      | 0.548   | 52 (52%)   | 48 (48%)        | 0.133   | 9 (9.0%)   | 91 (91.0%)  | 0.247   |
| Yes                      | 47 (58.8%) | 33 (41.2%)      |         | 32 (40%)   | 48 (60%)        |         | 12 (15.0%) | 68 (85.0%)  |         |

\* Fisher exact test
